# Supplementary material for: A molybdenum disulfide/nickel ferrite-modified voltammetric sensing platform for ultra-sensitive determination of clenbuterol under the presence of an external magnetic field
Source: Royal Society of Chemistry journal article supplement (doi:10.1039/d3ra01136d), 2023-01-01
Supplement: d3ra01136d1.pdf [file d3ra01136d1.pdf]

## Supporting Information

### **A Molybdenum disulfide/Nickel ferrite-Modified Voltammetric Sensing Platform for Ultra-Sensitive Determination of Clenbuterol under the presence of external magnetic field**

Van Manh Tien<sup>1+</sup>, Van Hoang Ong<sup>1,3,+</sup>, Tuyet Nhung Pham<sup>1\*</sup>, Nguyen Quang Hoa<sup>4</sup>, Thi Lan Nguyen<sup>5</sup>, Pham Duc Thang<sup>1,2</sup>, Le Khanh Vinh<sup>6</sup>, Pham Thi Nhat Trinh<sup>8</sup>, Doan Thi Ngoc Thanh<sup>9</sup>,  
Le Minh Tung<sup>7,\*\*</sup>, Anh-Tuan Le<sup>1,2 \*\*\*</sup>

(1) Phenikaa University Nano Institute (PHENA), PHENIKAA University, Hanoi 12116, Vietnam

(2) Faculty of Materials Science and Engineering, PHENIKAA University, Hanoi 12116, Vietnam

(3) University of Transport Technology, Trieu Khuc, Thanh Xuan District, Hanoi, Viet Nam

(4) Faculty of Physics, VNU University of Science, Vietnam National University, Hanoi, 334 Nguyen Trai, Thanh Xuan, Hanoi, Viet Nam

(5) International Training Institute for Materials Science (ITIMS), Hanoi University of Science and Technology (HUST), 01 Dai Co Viet Road, Hanoi, Vietnam

(6) Institute of Physics at Ho Chi Minh City, Vietnam Academy of Science and Technology (VAST), Ho Chi Minh 70000, Vietnam

(7) Department of Physics, Tien Giang University, My Tho city, Tien Giang Province, Viet Nam

(8) Department of Education and Basic Science, Tien Giang University, My Tho city, Tien Giang Province, Viet Nam

(9) Department of Agriculture and Food Technology, Tien Giang University, My Tho city, Tien Giang Province, Viet Nam

Corresponding authors:

\* [nhung.phamthituyet@phenikaa-uni.edu.vn](mailto:nhung.phamthituyet@phenikaa-uni.edu.vn) (T.N. Pham)

\*\* [leminhtung@tgu.edu.vn](mailto:leminhtung@tgu.edu.vn) (L.M. Tung)

\*\*\* [tuan.leanh@phenikaa-uni.edu.vn](mailto:tuan.leanh@phenikaa-uni.edu.vn) (A.-T. Le)

+ V.M. Tien and O.V. Hoang contributed equally to this work

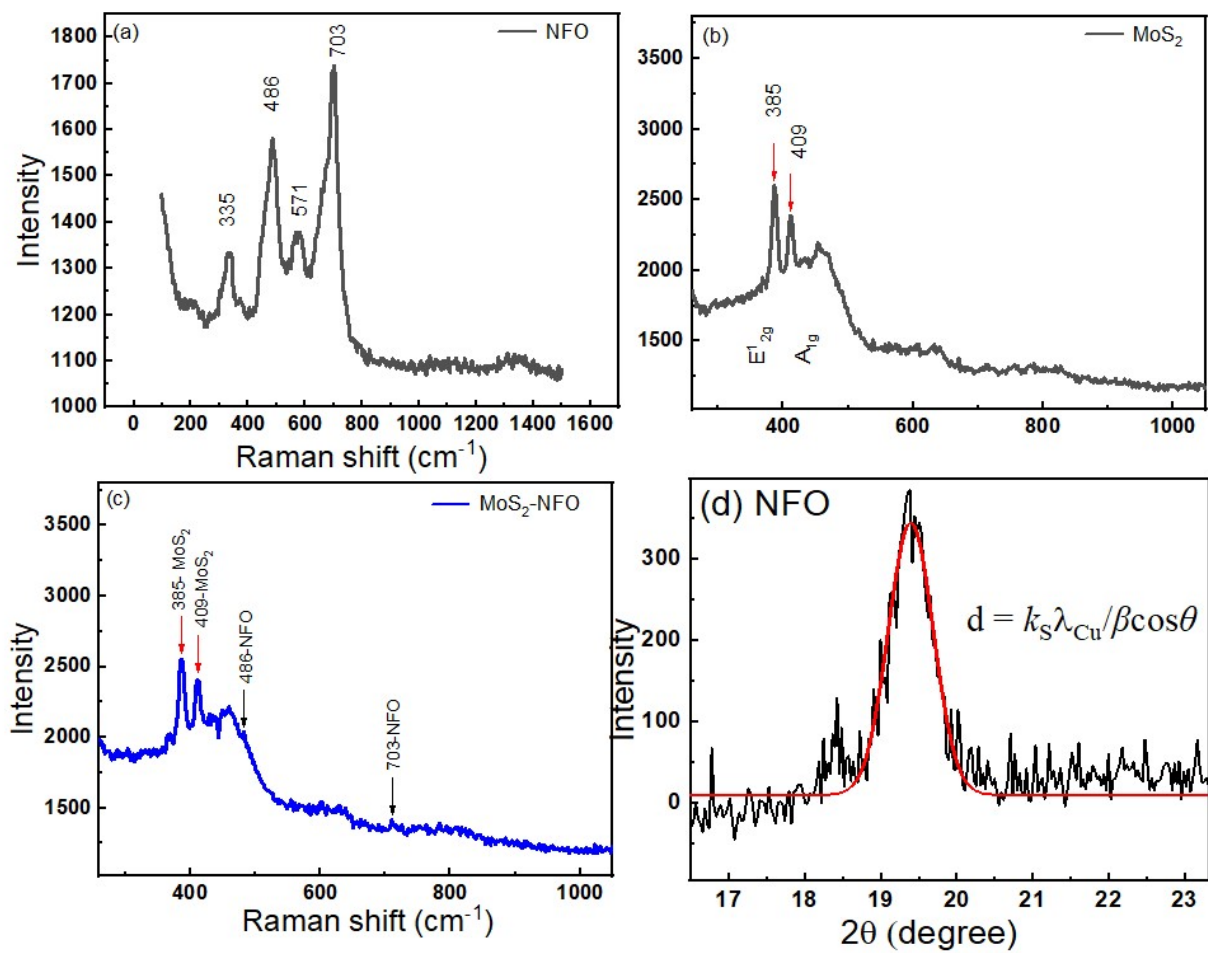

**Figure S1.** (a, b, and c): Raman spectra of NFO, MoS<sub>2</sub>, and MoS<sub>2</sub>-NFO, respectively; (d): Graphs and calculations for Scherrer's formula of NFO sample.

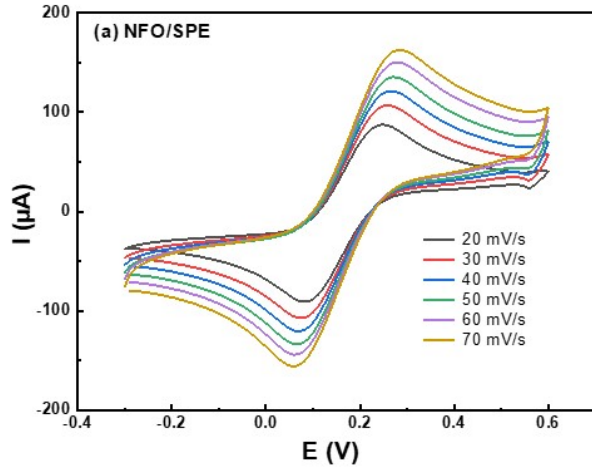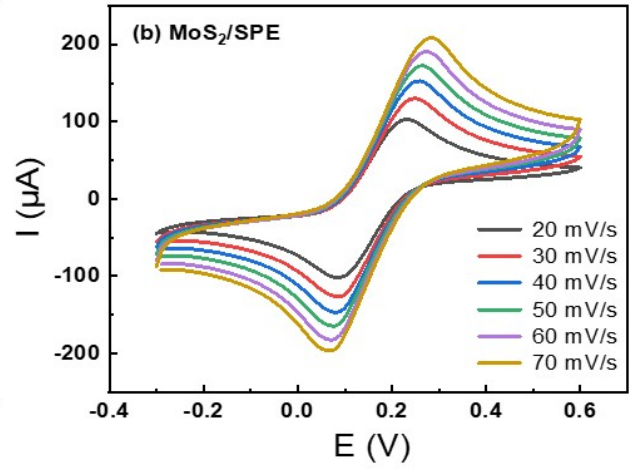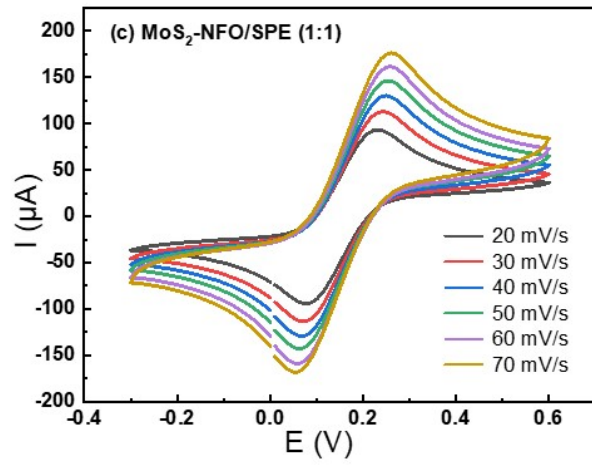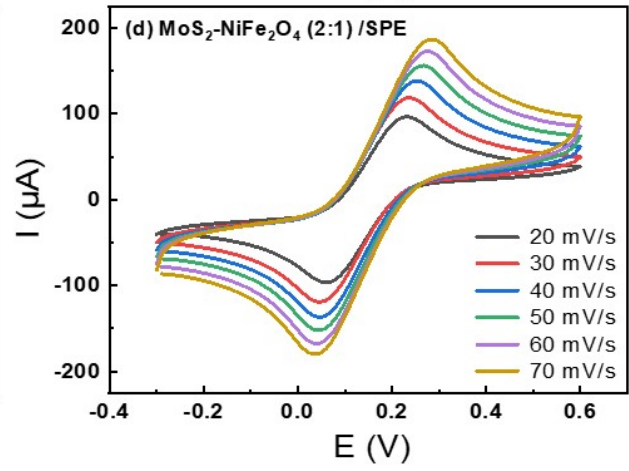

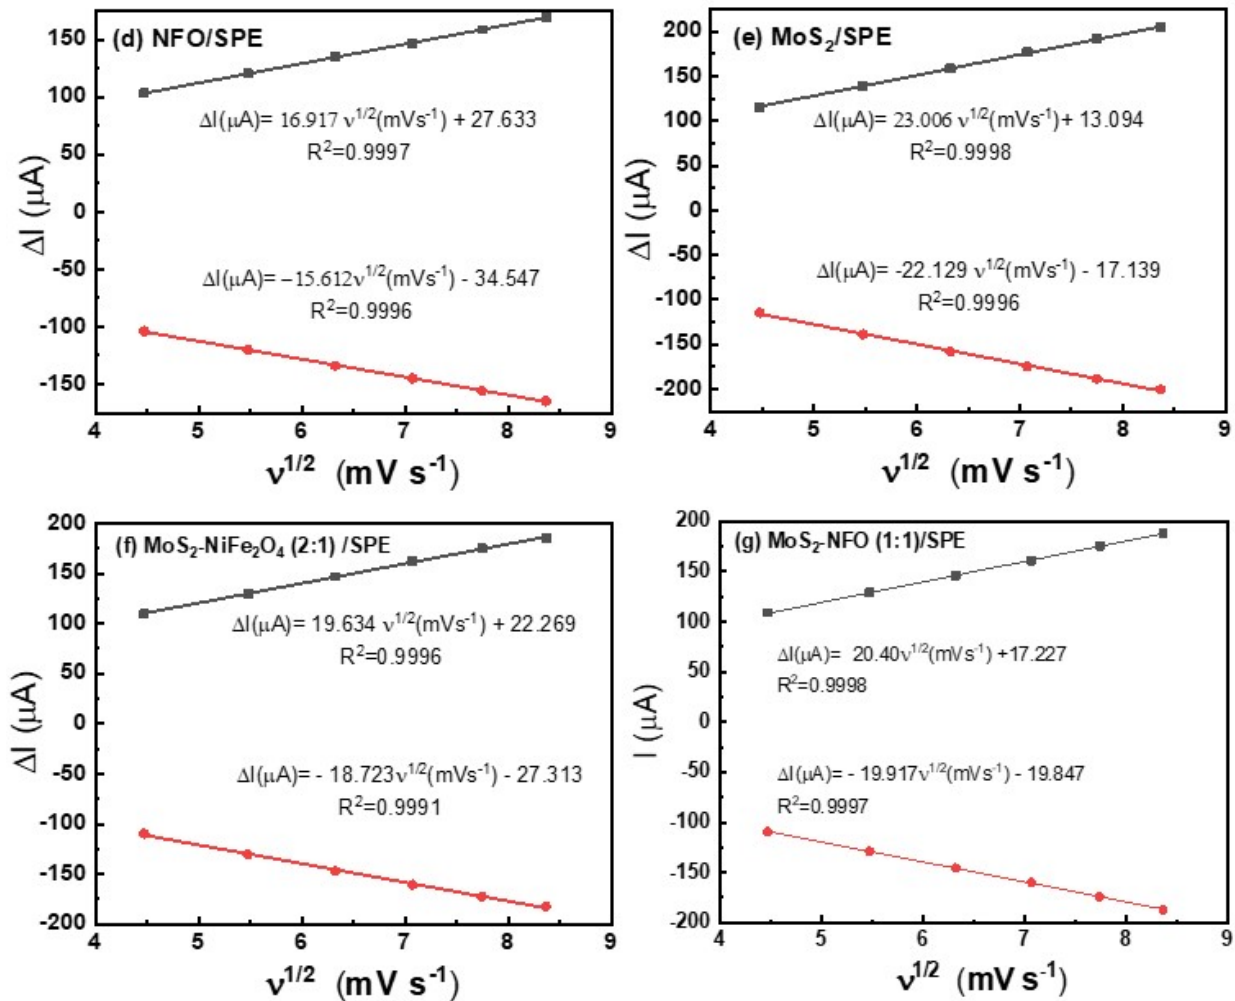

**Figure S2.** (a, b, c, and d): CV profiles of modified electrodes at various scan rates (20- 70  $\text{mV s}^{-1}$ ); and (e, f, g, and h): The corresponding linear plot of peak current response and sqrt of scan rate. All experiments were performed in 0.1 M KCl containing 5 mM  $[\text{Fe}(\text{CN})_6]^{3-/4-}$ .

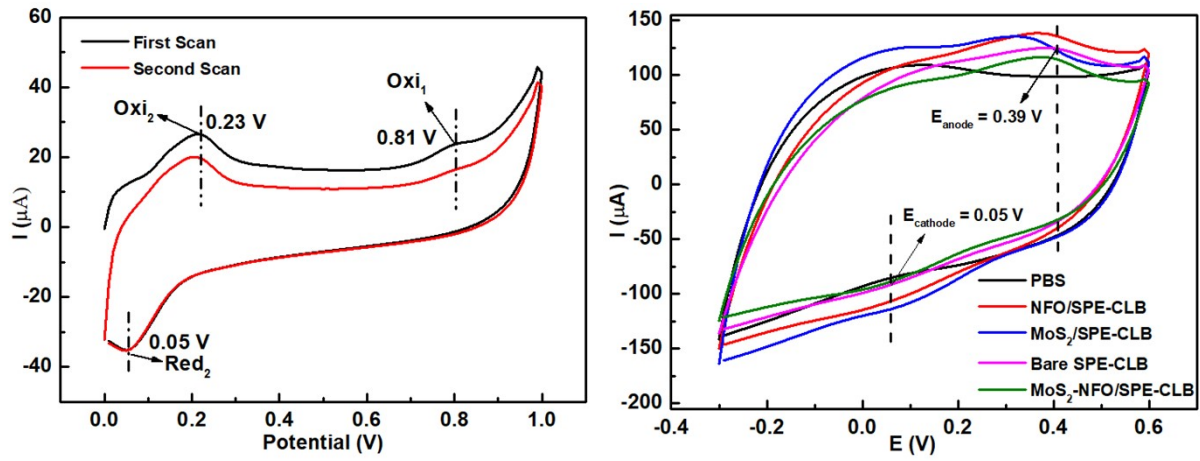

**Figure S3.** CV curves of bare SPE, MoS<sub>2</sub>/SPE, NFO/SPE, and MoS<sub>2</sub>-NFO(2:1)/SPE in pH 7.4 PBS buffer and PBS containing CLB, respectively.

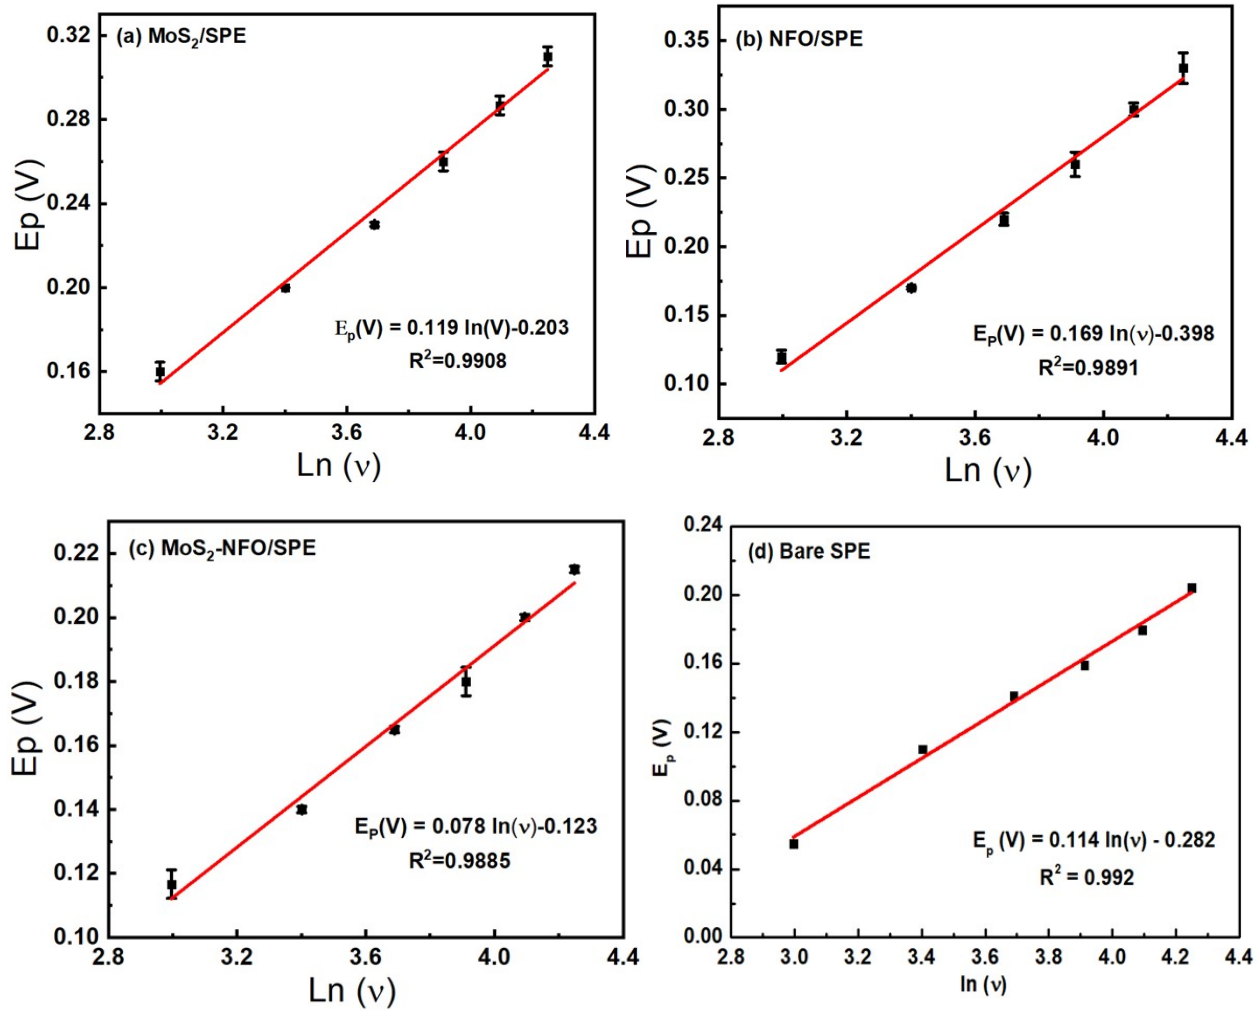

**Figure S4.** The linear relationship between  $E_p$  and the natural logarithm of scan rate  $\ln(v)$  at different scan rates from 20 to 70  $\text{mV s}^{-1}$  on the (a):  $\text{MoS}_2$ , (b): NFO, (c):  $\text{MoS}_2\text{-NFO}$  (2:1), and (d): bare SPE, respectively.

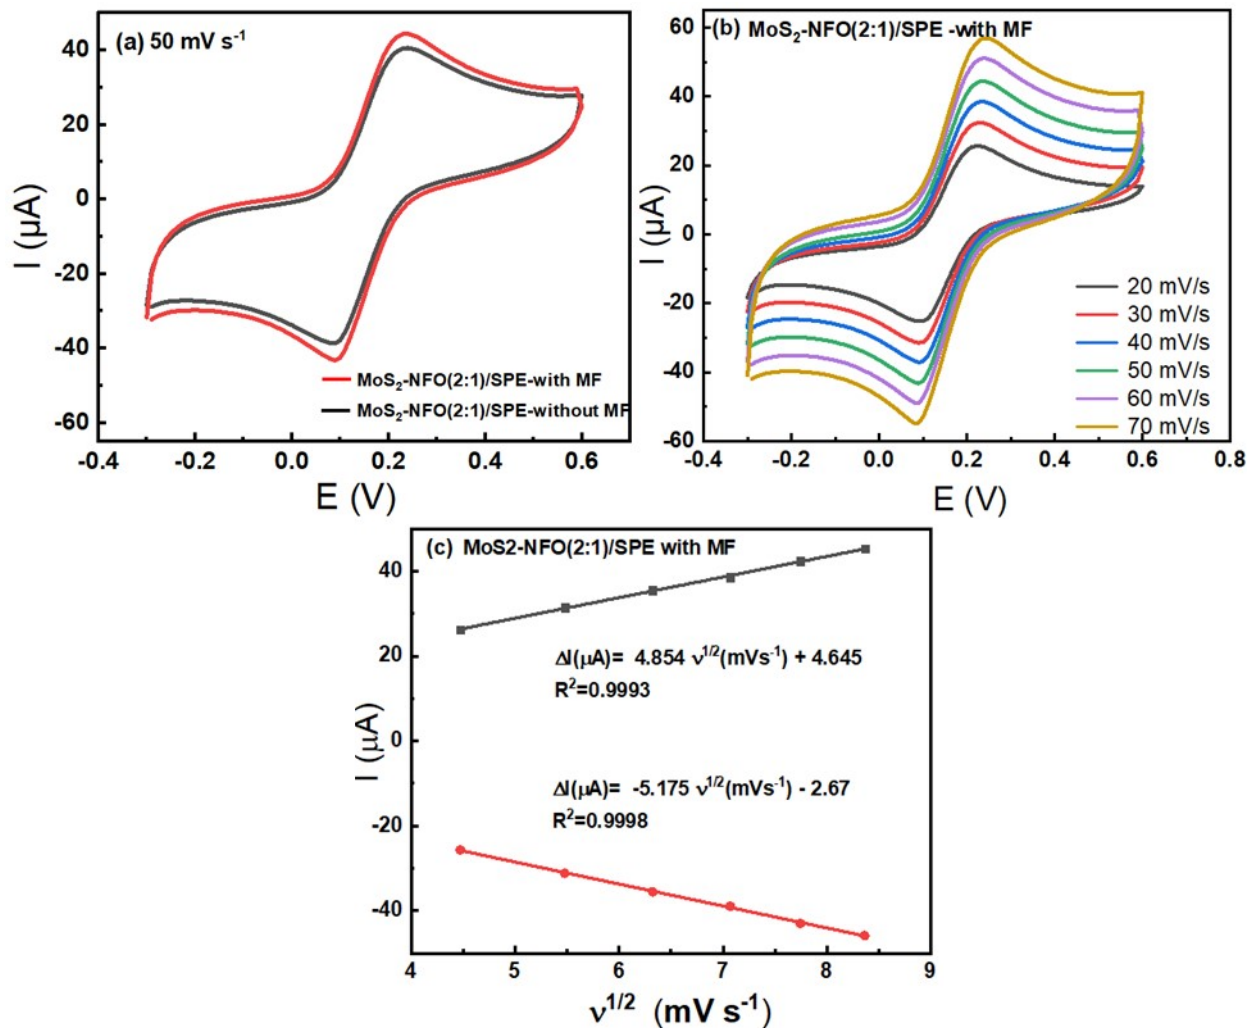

**Figure S5.** (a and b): CV curves of MoS<sub>2</sub>-NFO(2:1)/SPE in 0.1 M KCl solution containing 2.5 mM [Fe(CN)<sub>6</sub>]<sup>3-/4-</sup> under the support of external MF, (c): The corresponding to the plot of peak current (I) versus the square root of the scan rate (v<sup>1/2</sup>).



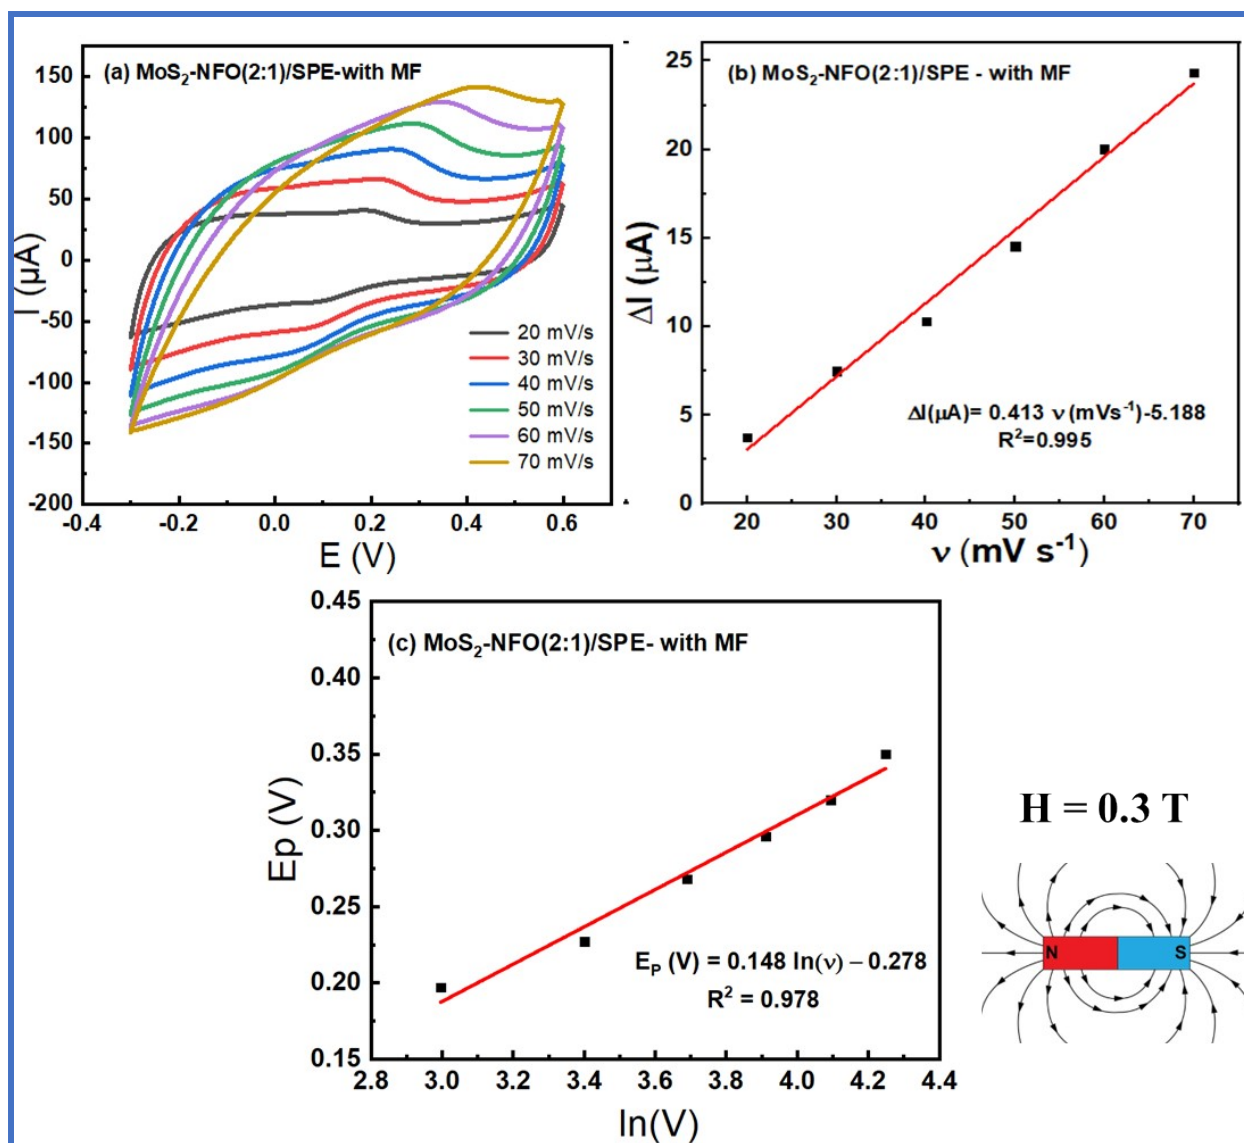

**Figure S6.** (a): CVs responses of 50  $\mu\text{M}$  CLB at MoS<sub>2</sub>-NFO(2:1)/SPE in 0.1M PBS buffer at different scan rates under the support of external MF; (b, c): The corresponding to the plot of peak current ( $I$ ) versus scan rate ( $v$ ) and  $E_p$  vs.  $\ln(v)$ , respectively.
